# Supplementary material for: Kidney Mass Reduction Leads to l‐Arginine Metabolism‐Dependent Blood Pressure Increase in Mice
Source: PubMed Central journal article supplement — J Am Heart Assoc. 2018 Feb 25;7(5):e008025. doi: 10.1161/JAHA.117.008025 (PMC5866334; doi:10.1161/jaha.117.008025), 2018-02-25
Supplement: JAH3-7-e008025-s001.pdf [file JAH3-7-e008025-s001.pdf]

# **SUPPLEMENTAL MATERIAL**

## ADMA and L-citrulline concentrations in plasma samples of male mice

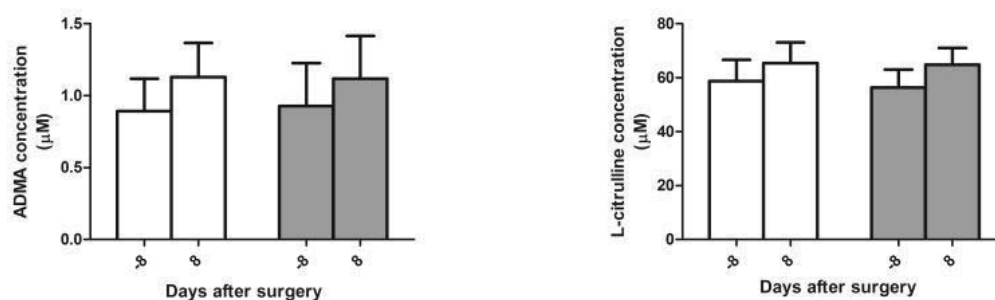

## ADMA and L-citrulline concentrations in plasma samples of female mice

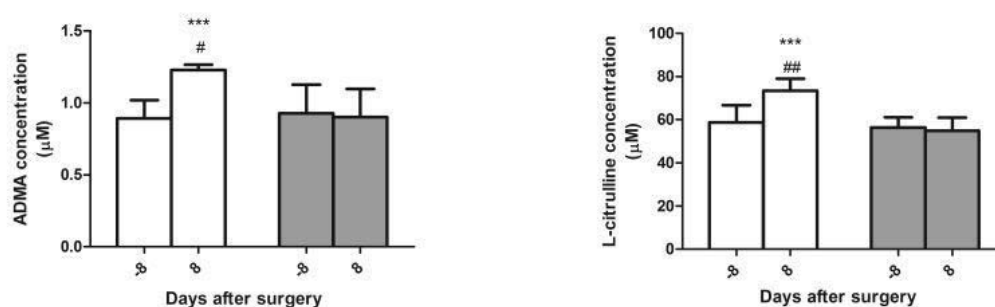

**Figure S1. Plasma ADMA and L-citrulline levels change upon UNX, compared to sham operated animals, only in female mice.**

The surgery performed at day zero induced an increase in the plasma concentration of ADMA and L-citrulline in both UNX and sham operated male mice. An increase was observed for plasma ADMA and L-citrulline levels only in female UNX mice. White and grey bars indicate UNX and sham operated animals respectively. \*\*\* $p < 0.001$ , comparing before and after surgery, #  $p < 0.05$ , ##  $p < 0.01$  comparing UNX and sham operated animals.  $n = 9-18$  animals per group.

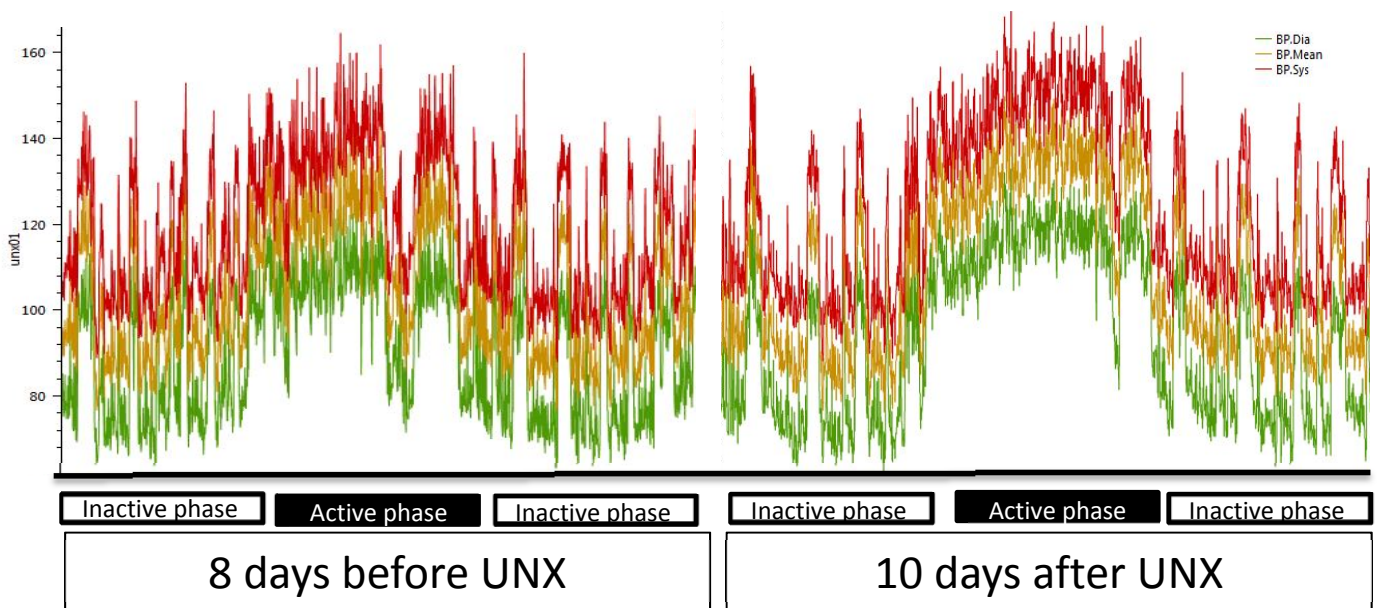

**Figure S2. Representative traces from one mouse (8 days before and 10 days after UNX).**

The green, brown and red traces indicate diastolic, mean and systolic blood pressure, respectively.

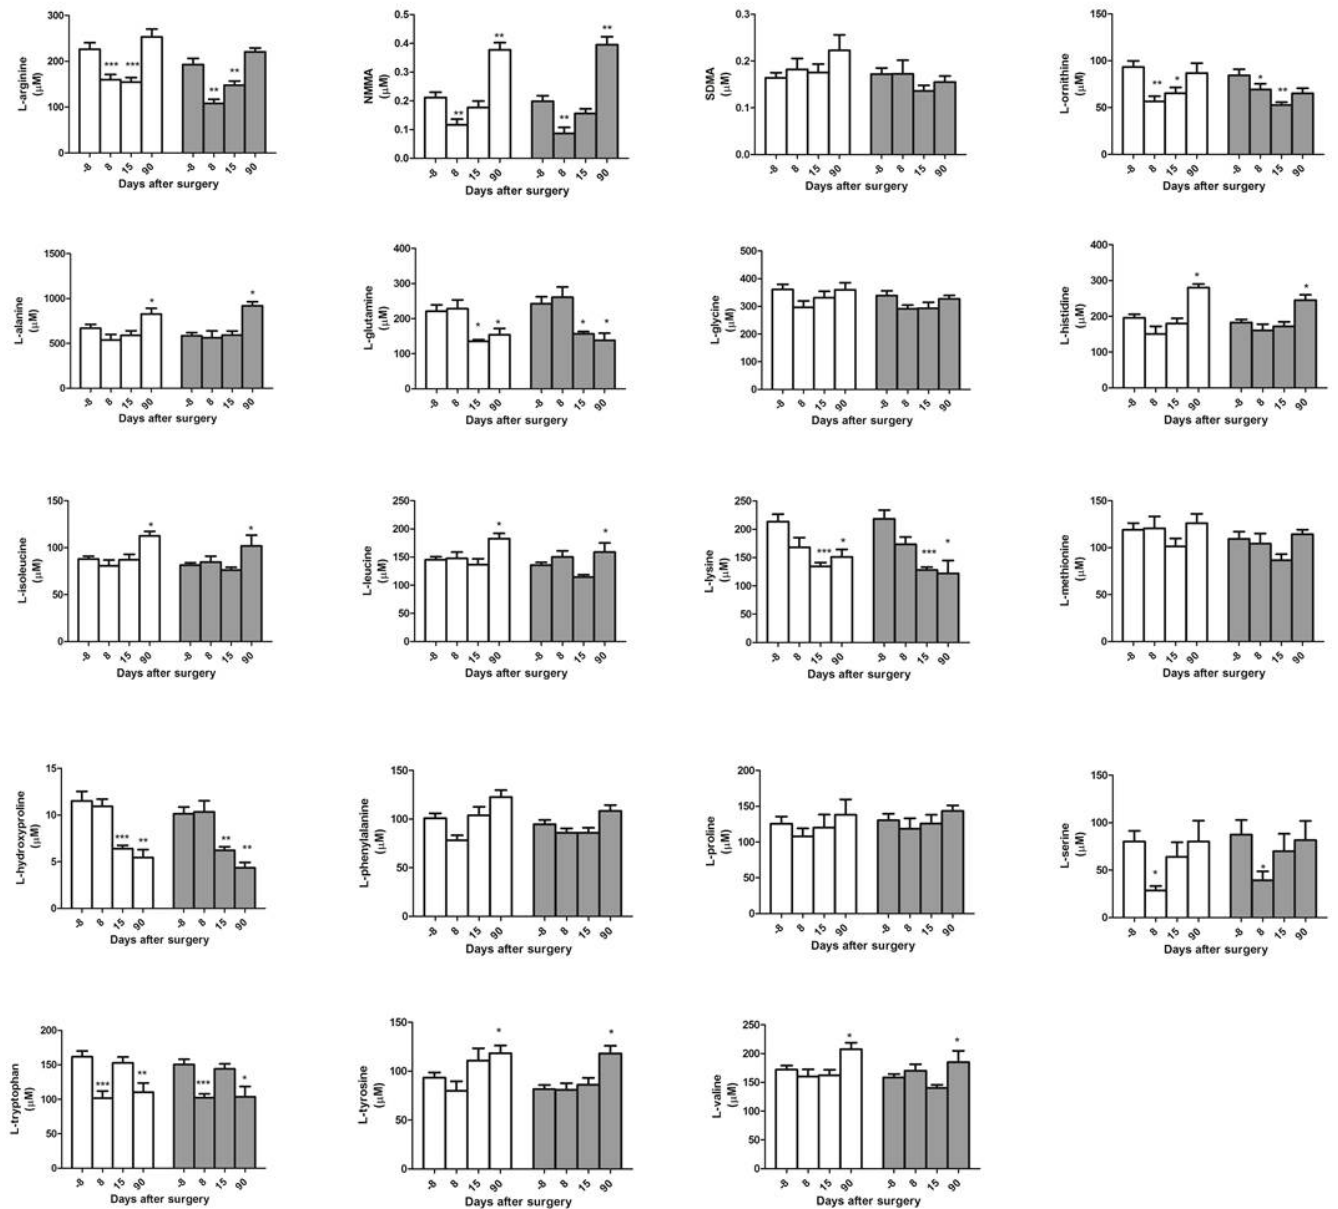

**Figure S3. No changes in the plasma Arginine, Ornithine, SDMA and NMMA levels between UNX and sham operated mice**

The surgery performed at day zero induced changes in the plasma concentration of several amino acids that were however not different in UNX and sham operated animals. White and grey bars indicate UNX and sham operated animals respectively. \* $p < 0.05$ , \*\* $p < 0.01$ , \*\*\* $p < 0.001$ , comparing before and after surgery.  $n = 9-18$  animals per group.
